# Supplementary material
Source: Springer Nature journal article supplement (https://www.springermedizin.de/resource/supplementary/12936_2011_2037_MOESM2_ESM.pdf/9543392)

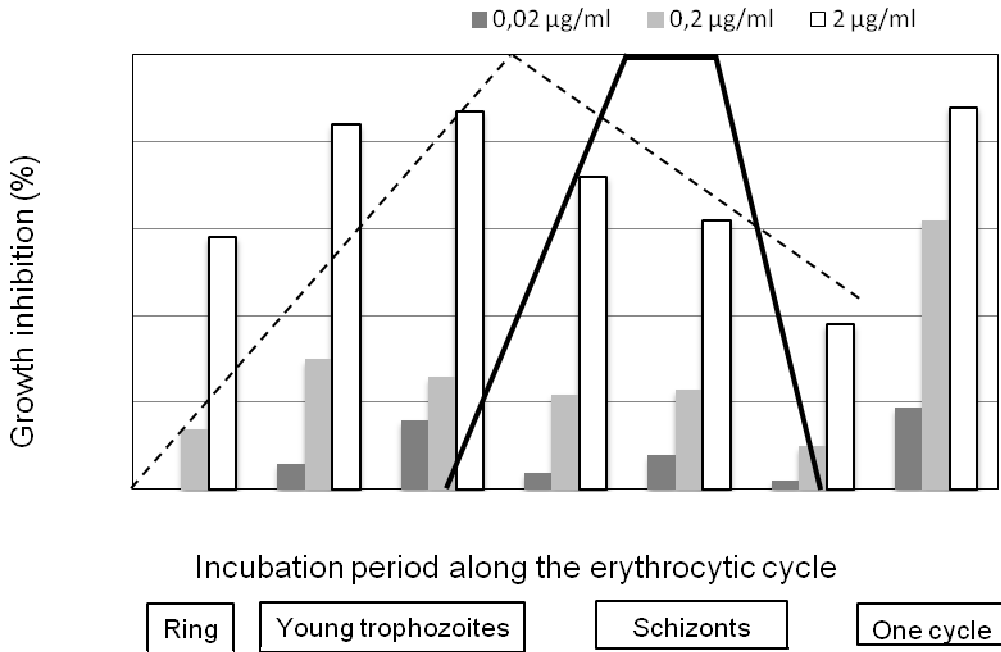

Supplement: MOESM2 [file 9543392]
